# Supplementary material
Source: PubMed Central journal article supplement (PMC6995728)
Supplement: NIHMS1534727-supplement-1.pdf [file NIHMS1534727-supplement-1.pdf]

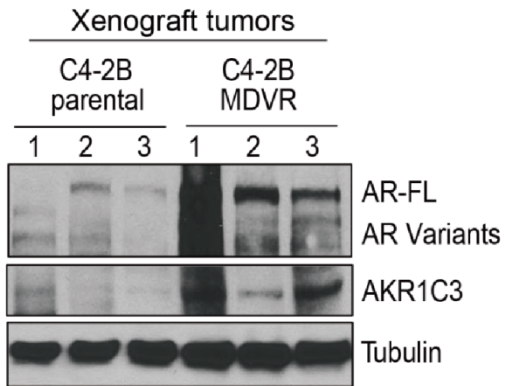

### Supplemental Figure 1

C4-2B parental and C4-2B MDVR tumors were processed and whole tumor lysates were extracted and subjected to western blot.

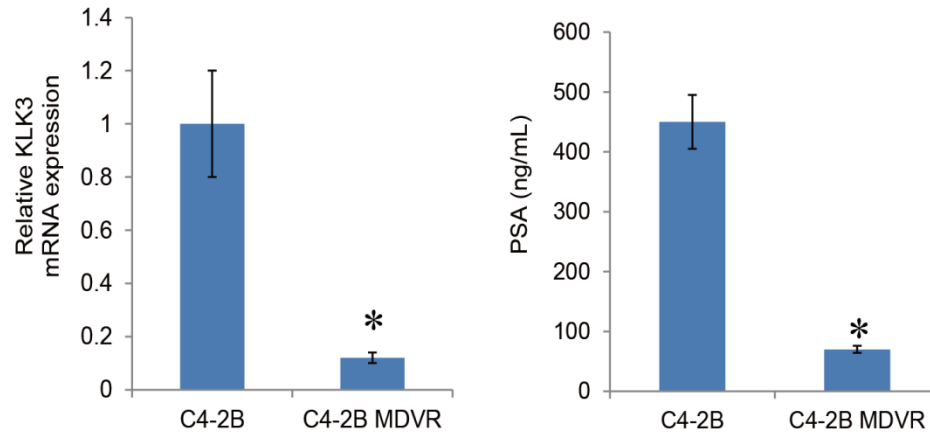

## Supplemental Figure 2

**Supplemental Fig.2** The KLK3 mRNA expression and PSA expression in C4-2B parental and C4-2B MDVR cells were determined by qRT-PCR and PSA ELISA respectively.

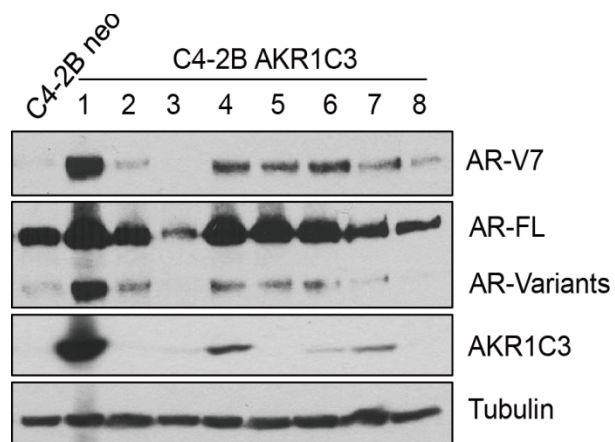

### Supplemental Figure 3

**Supplemental Fig.3** Eight C4-2B AKR1C3 stable clones were picked and whole cell lysates were extracted and subjected to western blot.

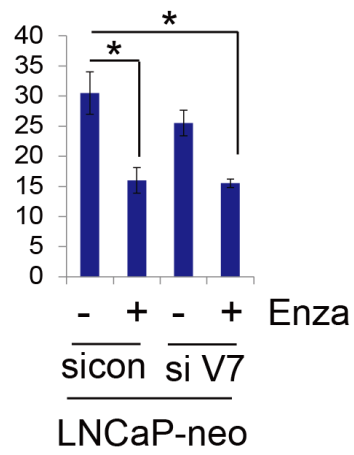

## Supplemental Figure 4

**Supplemental Fig.4** AR-V7 was knocked down in LNCaP-neo cells, cells were then treated with 20 μM enzalutamide for 5 days and total cell number was determined.
